# Supplementary material for: Integrated Analysis of Fatty Acid Metabolism and Transcriptome Involved in Olive Fruit Development to Improve Oil Composition
Source: MDPI journal article supplement (doi:10.3390/f12121773), 2021-12-14
Supplement: s1 [file s1]

## Supplementary Material

## Supplementary Figures

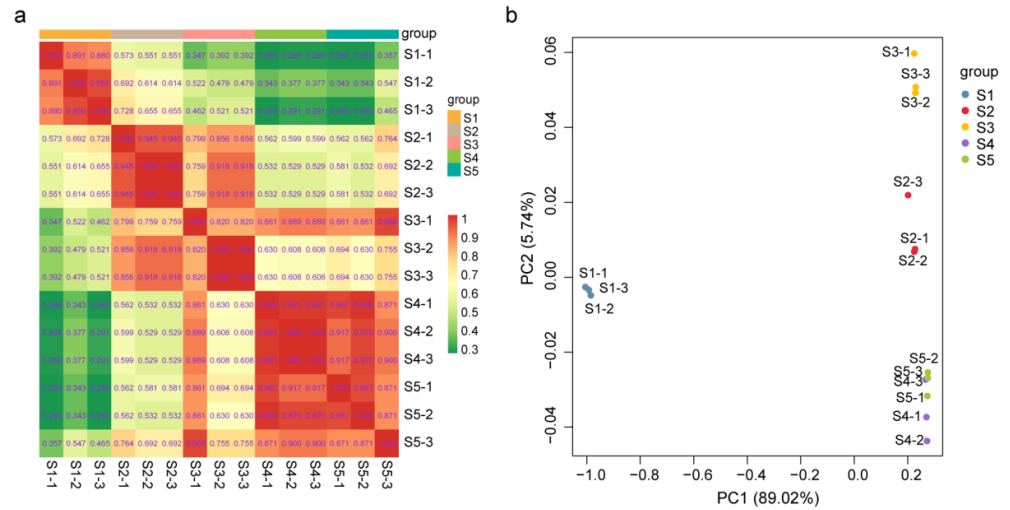

**Figure S1.** Correlation assessment and principal component analysis of five stages (S1–S5). Repeated correlation assessment (a) and principal component analysis (b) of all the olive samples.

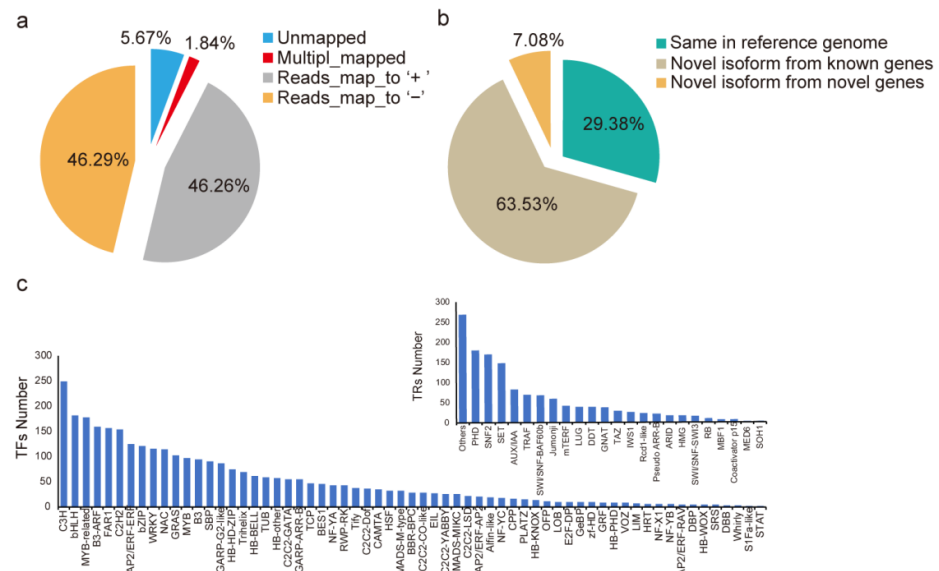

**Figure S2.** Genome mapping and transcriptional regulation of olive. (a) Comparison and mapping with the reference genome by GMAP mapping statistics. (b) Classification of mapped full-length transcripts. (c) The number of transcription factors (TFs) and transcription regulation factors (TRs).

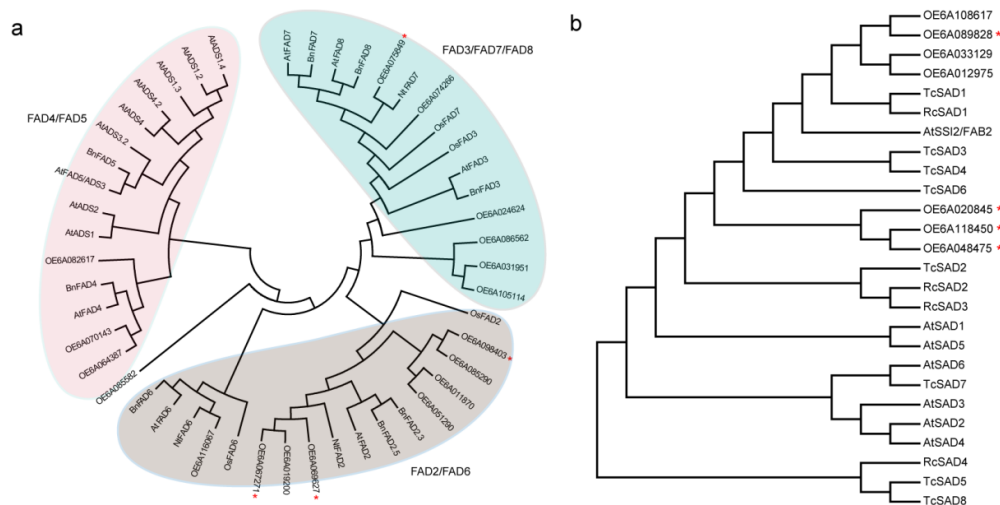

**Figure S3.** Putative genes of FAD (a) and SAD (b) identified at the developing stages of olive fruit. At, Arabidopsis thaliana; Bn, Brassica napus; Nt, Nicotiana tabacum; Os, Oryza sativa; Rc, castor; Tc, cacao.

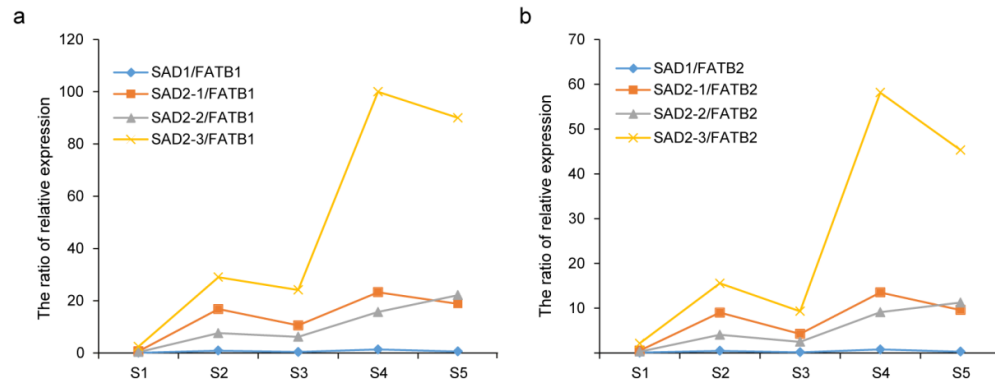

**Figure S4.** Dynamic changes in SADs/FATBs during olive fruit maturation. (a, b) The dynamic value of SADs/FATBs from S1 to S5. SAD1, OE6A089828; SAD2-1, OE6A118450; SAD2-2, OE6A048475; SAD2-3, OE6A020845; FAD6, OE6A116067; FATB1, OE6A080663; FATB2, OE6A029754; FATA1, OE6A018491; FATA2, OE6A059595.

**Table S1.** Differential expressed genes associated with FA synthesis in plastids at different stages.

| Candidate genes | S1vsS2 | S2vsS3 | S3vsS4 | S4vsS5 | Gene name |
|-----------------|--------|--------|--------|--------|-----------|
| OE6A042043      | -3.09  |        |        |        | CT        |
| OE6A055531      | -3.76  |        |        |        | CT        |
| OE6A092496      | -5.27  |        |        |        | BCCP      |
| OE6A034317      | -5.23  |        |        |        | BCCP      |
| OE6A006214      | -2.50  | -1.25  |        |        | BCCP      |
| OE6A018229      | -4.12  |        | -1.03  |        | BC        |
| OE6A118580      | -3.23  |        |        |        | BC        |
| OE6A119613      | -3.51  |        |        |        | MAT       |
| OE6A067994      | -3.74  |        |        | -1.04  | KASIII    |
| OE6A015649      | -1.63  |        |        |        | KASI      |
| OE6A049543      | -1.47  |        |        |        | KASI      |
| OE6A089647      | 1.90   |        |        |        | KASII     |
| OE6A120045      | -3.35  | -2.52  | -1.41  |        | KASII     |
| OE6A089717      |        | -1.29  |        |        | KAR       |
| OE6A094355      |        | -1.15  |        |        | KAR       |
| OE6A098105      | -4.28  |        |        |        | HAD       |

|            |       |       |       |       |        |
|------------|-------|-------|-------|-------|--------|
| OE6A104748 | -2.65 |       |       |       | EAR    |
| OE6A057837 | -3.33 |       |       |       | EAR    |
| OE6A114340 | -3.55 |       |       |       | EAR    |
| OE6A018491 | -2.15 |       |       |       | FATA   |
| OE6A059595 | -1.45 | -1.08 |       |       | FATA   |
| OE6A080663 | 1.06  |       |       |       | FATB   |
| OE6A029754 |       | 1.36  |       |       | FATB   |
| OE6A089828 | -2.02 |       |       |       | SAD1   |
| OE6A118450 | -3.71 |       |       |       | SAD2-1 |
| OE6A048475 | -3.35 |       |       |       | SAD2-2 |
| OE6A020845 | -2.49 |       | -1.47 |       | SAD2-3 |
| OE6A098403 | -2.52 | -1.57 |       |       | FAD2   |
| OE6A067271 | 4.77  |       |       |       | FAD2   |
| OE6A069627 | 1.32  |       |       |       | FAD2   |
| OE6A075849 | 3.65  |       | 1.49  | -2.45 | FAD7   |

Note: CT, carboxyltransferase; BCCP, carboxylated biotin carrier protein; BC, biotin carboxylase; MAT, malonyl-CoA ACP transacylase; KAS, ketoacyl-ACP synthase; KAR, ketoacyl-ACP reductase; HAD, hydroxyacyl-ACP dehydrase; EAR, enoyl-ACP reductase; FATA/B, acyl-ACP thioesterase A/B; SAD, stearoyl-ACP desaturase; FAD, fatty acid desaturase.
